# Supplementary material for: A study of the capacity fade of a LiCoO2/graphite battery during the temperature storage process at 45 °C under different SOCs
Source: Royal Society of Chemistry journal article supplement (doi:10.1039/d3ra07938d), 2024-01-01
Supplement: d3ra07938d1.pdf [file d3ra07938d1.pdf]

## **A study of capacity fade of the LiCoO<sub>2</sub>/graphite battery during the temperature storage process at 45°C under the different SOC's**

Weigang Liu<sup>a</sup>, Xinming Fan<sup>a,b\*</sup>, Jingqiang Zheng<sup>a</sup>, Zhi Zhang<sup>a</sup>, Erke Peng<sup>f\*</sup>, Zhaoyang Li<sup>a</sup>, Zhiyong Chen<sup>c</sup>, Hao Jiang<sup>c</sup>, Yan Tong<sup>c</sup>, Bo Hong<sup>a,d,e\*</sup>, Jie Li<sup>a,d,e</sup>

<sup>a</sup> School of Metallurgy and Environment, Central South University, Changsha, 410083, PR China

<sup>b</sup> Powder Metallurgy Research Institute, Central South University, Changsha 410083, Hunan, China

<sup>c</sup> Guangdong Mic-power New Energy Co., Ltd, Huizhou, 516000, PR China

<sup>d</sup> Engineering Research Centre of Advanced Battery Materials, The Ministry of Education, Changsha 410083, Hunan, China

<sup>e</sup> Hunan Provincial Key Laboratory of Value-added Metallurgy, Changsha 410083, Hunan, China

<sup>f</sup> School of Geosciences and Info-Physics, Central South University, Changsha 410083, China

Email: fanxinming@csu.edu.cn (Xinming Fan); erkepeng@gmail.com (Erke Peng);

bop\_hong@163.com (Bo Hong)

**This file includes:**

**Figure S1-7**

**Tables S1-7**

**Equations (1)-(11)**

## 2.1. Battery storage system

The M1254 battery from Guangdong Microelectronics New Energy Co., Ltd. was selected for the study. The battery uses LCO as the cathode ( $0.0326 \text{ g}\cdot\text{cm}^{-2}$ ) and graphite as the anode ( $0.0148 \text{ g}\cdot\text{cm}^{-2}$ ),  $\text{LiPF}_6$ -based electrolyte with a standard capacity of 63 mAh and the polyethylene separator coated with alumina.

**Initial capacity** (expressed as  $C_0$ ) calibration method: Under the condition of  $25\pm 1.5^\circ\text{C}$ , the battery is charged to 4.2 V at 0.75 C, then kept at 4.2 V constant voltage until the cut-off current is 2mA. Then the battery is discharged to 3.0 V at 0.2 C for 3 cycles, and the average discharge capacity of the three cycles is the initial capacity of the battery.

Battery  $45^\circ\text{C}$  storage method: After the battery is charged to different SOC, its impedance, and open circuit voltage are tested. Then the battery is stored in a thermostat at  $45\pm 1.5^\circ\text{C}$  for the corresponding time (1 month, 2 months, 3 months, and 6 months).

Measurement of the **Retention capacity** (expressed as  $C_1$ ) of the battery: After the battery storage time reaches, the battery is removed and the impedance and open circuit voltage are tested. The battery is stored in a thermostat at  $25\pm 1.5^\circ\text{C}$  for 0.5 h and then discharged to 3.0 V at 0.2 C to test the retention capacity after storage.

Measurement of the **Recovery capacity** (expressed as  $C_2$ ) of the battery: After testing the retention capacity, the battery is charged to 4.2 V at 0.75 C, then kept 4.2 V constant voltage until the cut-off current is 2 mA, and then discharged to 3.0 V at 0.2 C. The battery is then discharged to 3.0 V at 0.2 C for three cycles, and the average of

three cycles of discharge capacity is taken as the recovery capacity of the battery after storage.

***Storage fading capacity*** (expressed as  $C_f$ ) of the battery = Initial capacity - Retained capacity

***Restored capacity*** (expressed as  $C_{re}$ ) of the battery = Recovery capacity - Retained capacity

***Lost capacity*** (expressed as  $C_{lost}$ ) of the battery = Initial capacity - Recovery capacity

We define the calculation formula of the rate of retained capacity and the rate of recovery capacity for different SOC as follows.

Calculation formula of the rate of retained capacity:

$$\text{The rate of retained capacity} = \frac{\text{Retained capacity} + \text{Initial capacity} - \text{Capacity of SOC}}{\text{Initial capacity}}$$

Calculation formula of the rate of recovery capacity:

$$\text{The rate of recovery capacity} = \frac{\text{Recovered capacity}}{\text{Initial capacity}}$$

## ***2.2 Disassemble the battery and test***

The battery is stored in a 45°C thermostat (POELAB, BLH-300), and charged and discharged in a 25°C battery test cabinet (Neware CT-4008T-5V1A). The voltage and internal resistance of the battery are tested by an internal resistance tester (HIOKI,

Battery Hi Tester 3561), and the electrochemical impedance spectrum (EIS) curves of the battery in the 10 MHz-100 kHz range before and after storage are obtained by an electrochemical workstation (Donghua DH7006). For battery disassembly, the cells are disassembled in a glove box ( $O_2 \leq 0.01$  ppm, water  $\leq 0.01$  ppm). The disassembled electrodes and separators are soaked in dimethyl carbonate (DMC, 98% purity) (10 mL pipette dose) for 1 h, and then cleaned with 10 mL DMC. Samples are analyzed by scanning electron microscopy (SEM MIRA4 LMH), energy dispersive spectrometry (EDS, Ultim Max 40), X-ray diffraction (XRD, PANalytical Empyrean), X-ray photoelectron spectroscopy (XPS, Thermo Scientific K-Alpha), transmission electron microscopy (TEM, JEOL 2100F, JEOL).

### ***2.3 Dissolution and detection of anode***

The disassembled and cleaned anode is dried in an oven at 60 - 80°C. The weight of the whole anode is weighed and then put into a beaker, 5 mL of concentrated nitric acid (68%) is added to the beaker, and 15 mL of deionized ultrapure water is added at the same time. The beaker is heated to 100°C and stirred for 15 minutes. When the anode is completely dissolved, the volume is fixed to 500 mL, and the content of lithium and cobalt in the fixed solution is determined by the AAS method.

**Equations (1)-(4):**

$$\text{Under 30\% SOC: } y = -0.01289 + 0.03731x \quad R^2(\text{COD}) = 0.99257 \quad (1)$$

$$\text{Under 50\% SOC: } y = 0.00244 + 0.01244x \quad R^2(\text{COD}) = 0.98718 \quad (2)$$

$$\text{Under 75\% SOC: } y = 0.04653 + 0.01226x \quad R^2(\text{COD}) = 0.98796 \quad (3)$$

$$\text{Under 100\% SOC: } y = 0.02603 + 0.0195x \quad R^2(\text{COD}) = 0.99273 \quad (4)$$

Where  $x$  represents storage time, it is calculated on a monthly basis. COD is the coefficient of determination in Origin, also known as the goodness of fit. When the value of  $R^2$  is closer to 1, the higher the relevant equation reference value; Instead, the value of  $R^2$  is closer to 0, the lower the reference value is.

**Equations (5)-(8):**

$$\text{Under 30\% SOC: } y = 100.31179 - 2.40643x \quad R^2(\text{COD}) = 0.97008 \quad (5)$$

$$\text{Under 50\% SOC: } y = 98.075 - 2.39x \quad R^2(\text{COD}) = 0.98546 \quad (6)$$

$$\text{Under 75\% SOC: } y = 96.65893 - 2.31214x \quad R^2(\text{COD}) = 0.99285 \quad (7)$$

$$\text{Under 100\% SOC: } y = 98.73179 - 1.90643x \quad R^2(\text{COD}) = 0.97718 \quad (8)$$

Where  $x$  represents storage time, it is calculated on a monthly basis.

**Equations (9)-(11):**

$$\text{The content of Li in the anode: } y = 0.96821 + 0.16143x \quad R^2(\text{COD}) = 0.99118 \quad (9)$$

$$\text{The content of Co in the anode: } y = 0.02639 + 0.01429x \quad R^2(\text{COD}) = 0.98565 \quad (10)$$

Li mass in anode / Li mass lost in capacity:  $y=0.9914+0.05036x$

$$R^2(\text{COD})=0.99696 \quad (11)$$

Where  $x$  represents storage time, it is calculated on a monthly basis.

**Table S1** Capacity data under 0% SOC stored 1-3 months at 45°C

| Initial<br>capacity<br>/mAh | Charge<br>capacity<br>/mAh | Voltage<br>before<br>storage/V | Storage<br>time | Retained<br>capacity/mAh | Voltage after<br>storage/V | Recovery<br>capacity | Rate of<br>Retained<br>capacity | Rate of<br>recovery<br>capacity |
|-----------------------------|----------------------------|--------------------------------|-----------------|--------------------------|----------------------------|----------------------|---------------------------------|---------------------------------|
| 66.1                        | 0                          | 3.3348                         | 1 month         | 0                        | 2.9532                     | 64.7                 | 0%                              | 97.88%                          |
| 66.1                        | 0                          | 3.3355                         | 2 months        | 0                        | 0.6522                     | 13.15                | 0%                              | 19.89%                          |
| 65.9                        | 0                          | 3.3345                         | 3 months        | 0                        | -0.013                     | 0.005                | 0%                              | 0.008%                          |

**Table S2** Capacity data under different SOC stored 1-6 months at 45°C

| Initial<br>capacit<br>y /mAh | Charge<br>capacit<br>y /mAh | Storage<br>time | SOC      | Retaine<br>d<br>capacity<br>/mAh | Recov<br>ery<br>capaci<br>ty | Rate of<br>retained<br>capacity | Deviation<br>of<br>retained<br>capacity<br>ratio | Rate of<br>recovery<br>capacity | Deviation of<br>recovery<br>capacity<br>ratio |
|------------------------------|-----------------------------|-----------------|----------|----------------------------------|------------------------------|---------------------------------|--------------------------------------------------|---------------------------------|-----------------------------------------------|
| 65.29                        | 19.59                       | 1<br>month      | 30%      | 16.74                            | 64.46                        | 95.64%                          | 1.47%                                            | 98.73%                          | 1.15%                                         |
| 62.1                         | 31.1                        |                 | 50%      | 26.7                             | 59.8                         | 92.91%                          | 0.49%                                            | 96.30%                          | 0.48%                                         |
| 62.95                        | 47.25                       |                 | 75%      | 40.65                            | 59.7                         | 89.52%                          | 0.15%                                            | 94.84%                          | 0.12%                                         |
| 61.93                        | 61.93                       |                 | 100<br>% | 55.58                            | 60.32                        | 89.75%                          | 0.78%                                            | 97.40%                          | 0.25%                                         |
| 65                           | 19.5                        | 2<br>months     | 30%      | 13.36                            | 61.88                        | 90.56%                          | 1.79%                                            | 95.40%                          | 1.26%                                         |
| 64.05                        | 32.05                       |                 | 50%      | 24                               | 59.65                        | 87.43%                          | 0.58%                                            | 93.13%                          | 0.17%                                         |
| 63.75                        | 47.85                       |                 | 75%      | 38.1                             | 58.45                        | 84.71%                          | 0.26%                                            | 91.69%                          | 0.22%                                         |
| 62.5                         | 62.5                        |                 | 100<br>% | 53.3                             | 59.25                        | 85.28%                          | 0.51%                                            | 94.80%                          | 0.5%                                          |
| 65                           | 19.5                        | 3<br>months     | 30%      | 9.6                              | 59.7                         | 84.77%                          | 0.56%                                            | 91.85%                          | 0.76%                                         |
| 64.88                        | 32.45                       |                 | 50%      | 20.43                            | 58.45                        | 81.47%                          | 0.67%                                            | 90.10%                          | 0.24%                                         |
| 64.65                        | 48.5                        |                 | 75%      | 35.4                             | 57.78                        | 79.74%                          | 0.16%                                            | 89.36%                          | 0.29%                                         |
| 61.4                         | 61.4                        |                 | 100<br>% | 49.35                            | 56.6                         | 80.37%                          | 1.05%                                            | 92.18%                          | 0.71%                                         |
| 65.4                         | 19.6                        | 6<br>month      | 30%      | 3.4                              | 56.5                         | 75.23%                          | 1.16%                                            | 86.39%                          | 0.32%                                         |
| 66.0                         | 33.0                        |                 | 50%      | 13.93                            | 55.5                         | 71.11%                          | 0.74%                                            | 84.09%                          | 0.45%                                         |

|       |       |   |     |       |       |        |       |        |       |
|-------|-------|---|-----|-------|-------|--------|-------|--------|-------|
| 65.87 | 49.4  | s | 75% | 27.97 | 54.67 | 67.47% | 1.1%  | 83.00% | 0.93% |
|       |       |   | 100 |       |       |        |       |        |       |
| 62.18 | 62.18 |   |     | 45.33 | 54.50 | 72.90% | 1.45% | 87.65% | 1.16% |
|       |       |   | %   |       |       |        |       |        |       |

---

**Table S3** Data of voltage and Internal resistance under different SOC's stored for 1-6 months at 45°C

| Voltage before storage/V | Internal resistance /mΩ | Storage time | SOC  | Voltage after storage/V | Internal impedance /mΩ | Rate of change of internal impedance |
|--------------------------|-------------------------|--------------|------|-------------------------|------------------------|--------------------------------------|
| 3.7844                   | 365.05                  | 1 month      | 30%  | 3.7527                  | 377.7                  | 3.47%                                |
| 3.834                    | 348.95                  |              | 50%  | 3.818                   | 367.6                  | 5.34%                                |
| 3.9848                   | 368.6                   |              | 75%  | 3.9277                  | 380.7                  | 3.28%                                |
| 4.181                    | 374.68                  |              | 100% | 4.1385                  | 456.3                  | 21.78%                               |
| 3.7862                   | 355.2                   | 2 months     | 30%  | 3.7273                  | 388.5                  | 9.37%                                |
| 3.8372                   | 375.25                  |              | 50%  | 3.8138                  | 431.8                  | 15.07%                               |
| 3.9855                   | 382.55                  |              | 75%  | 3.9156                  | 413.35                 | 8.05%                                |
| 4.1805                   | 369                     |              | 100% | 4.1155                  | 478.99                 | 29.81%                               |
| 3.7852                   | 370.05                  | 3 months     | 30%  | 3.6945                  | 415.1                  | 12.17%                               |
| 3.8361                   | 362.43                  |              | 50%  | 3.793                   | 430.03                 | 18.65%                               |
| 3.9861                   | 364.9                   |              | 75%  | 3.8984                  | 439.15                 | 20.35%                               |
| 4.187                    | 395.2                   |              | 100% | 4.0974                  | 535.47                 | 35.49%                               |
| 3.7811                   | 321.52                  | 6 months     | 30%  | 3.5662                  | 419.5                  | 30.47%                               |
| 3.8263                   | 320.33                  |              | 50%  | 3.7498                  | 466.8                  | 45.72%                               |
| 3.9793                   | 326.9                   |              | 75%  | 3.8607                  | 522.23                 | 59.75%                               |
| 4.1883                   | 332.33                  |              | 100% | 4.0702                  | 532.5                  | 60.23%                               |



**Table S4** EIS fit data before storage and after 1-6 months of storage under 100% SOC at 45°C

| Storage  | $R_s$                          | $Y_f$                                  |      | $R_f$                          | $Y_{dl}$                               |      | $R_{ct}$                       | $W$               | ave  | chi                  |
|----------|--------------------------------|----------------------------------------|------|--------------------------------|----------------------------------------|------|--------------------------------|-------------------|------|----------------------|
| time     |                                |                                        | $n$  |                                |                                        | $n$  |                                | $S \cdot s^{0.5}$ | err  | squared              |
|          | ( $\Omega \cdot \text{cm}^2$ ) | ( $S \cdot s^n \cdot \text{cm}^{-2}$ ) |      | ( $\Omega \cdot \text{cm}^2$ ) | ( $S \cdot s^n \cdot \text{cm}^{-2}$ ) |      | ( $\Omega \cdot \text{cm}^2$ ) |                   | (%)  |                      |
| Before   | 0.27                           | $1.002 \times 10^{-2}$                 | 0.95 | 0.21                           | $6.49 \times 10^{-3}$                  | 0.68 | 0.299                          | 3.64              | 1.93 | $5.2 \times 10^{-4}$ |
| storage  |                                |                                        |      |                                |                                        |      |                                |                   |      |                      |
| 1 month  | 0.32                           | $1.148 \times 10^{-2}$                 | 0.92 | 0.407                          | $1.07 \times 10^{-2}$                  | 0.60 | 1.02                           | 2.95              | 2.02 | $4.2 \times 10^{-4}$ |
| 2 months | 0.33                           | $1.349 \times 10^{-2}$                 | 0.81 | 0.415                          | $2.10 \times 10^{-2}$                  | 0.61 | 1.20                           | 2.11              | 2.15 | $5.7 \times 10^{-4}$ |
| 3 months | 0.38                           | $1.873 \times 10^{-2}$                 | 0.97 | 0.425                          | $2.29 \times 10^{-2}$                  | 0.52 | 1.48                           | 3.04              | 1.13 | $1.8 \times 10^{-4}$ |
| 6 months | 0.47                           | $2.029 \times 10^{-2}$                 | 0.98 | 0.462                          | $2.52 \times 10^{-2}$                  | 0.59 | 1.79                           | 1.932             | 0.96 | $3.5 \times 10^{-4}$ |

**Table S5** Data of  $R_s$ ,  $R_f$  and  $R_{ct}$  under different SOC's stored for 1-6 months at 45°C

| SOC  | Storage time       | $R_s$ ( $\Omega$ ) | $R_f$ ( $\Omega$ ) | $R_{ct}$ ( $\Omega$ ) |
|------|--------------------|--------------------|--------------------|-----------------------|
| 0%   | Before the storage | 0.274              | 0.412              | 0.864                 |
|      | 1 month            | 0.376              | 0.639              | 1.92                  |
|      | 2 months           | 0.355              | 0.664              | 2.15                  |
| 30%  | 3 months           | 0.382              | 0.691              | 2.32                  |
|      | 6 months           | 0.389              | 0.739              | 2.46                  |
|      | 1 month            | 0.362              | 0.533              | 1.51                  |
| 50%  | 2 months           | 0.347              | 0.549              | 1.82                  |
|      | 3 months           | 0.377              | 0.563              | 2.03                  |
|      | 6 months           | 0.306              | 0.578              | 2.27                  |
| 75%  | 1 month            | 0.302              | 0.462              | 1.32                  |
|      | 2 months           | 0.328              | 0.484              | 1.55                  |
|      | 3 months           | 0.343              | 0.502              | 1.79                  |
| 100% | 6 months           | 0.369              | 0.531              | 2.01                  |
|      | 1 month            | 0.322              | 0.407              | 1.02                  |
|      | 2 months           | 0.334              | 0.415              | 1.20                  |
|      | 3 months           | 0.381              | 0.425              | 1.48                  |
|      | 6 months           | 0.473              | 0.462              | 1.79                  |



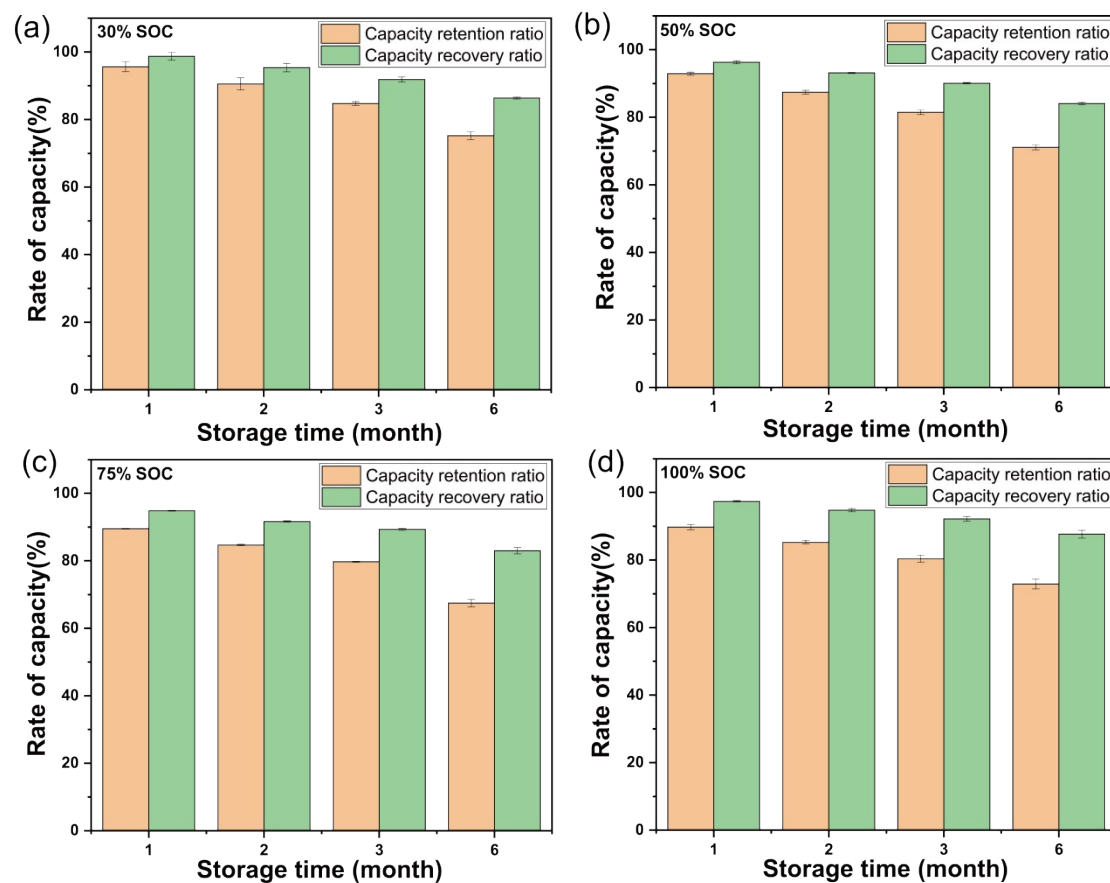

**Figure S1** Capacity deviation diagram for capacity retention ratio and capacity recovery ratio under different SOC's stored for 1 to 6 months at 45°C.

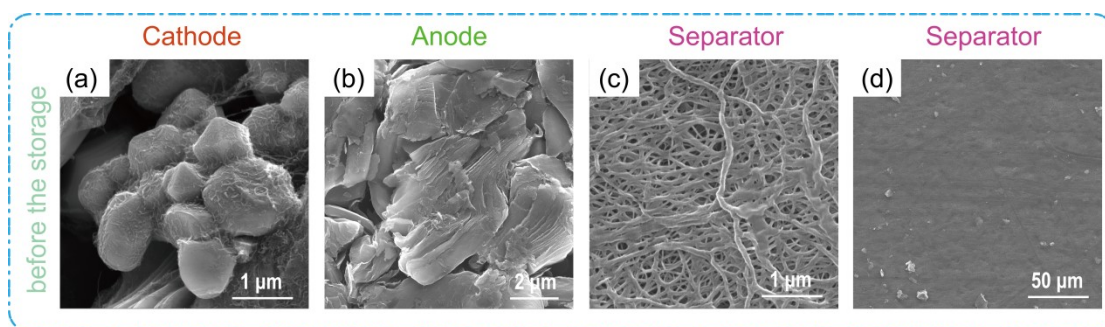

**Figure S2** (a) Electron micrographs of the cathode at size 1  $\mu\text{m}$ . (b) SEM of anode at size 2  $\mu\text{m}$ . (c)-(d) separator at size 1  $\mu\text{m}$  and 50  $\mu\text{m}$ , separately.

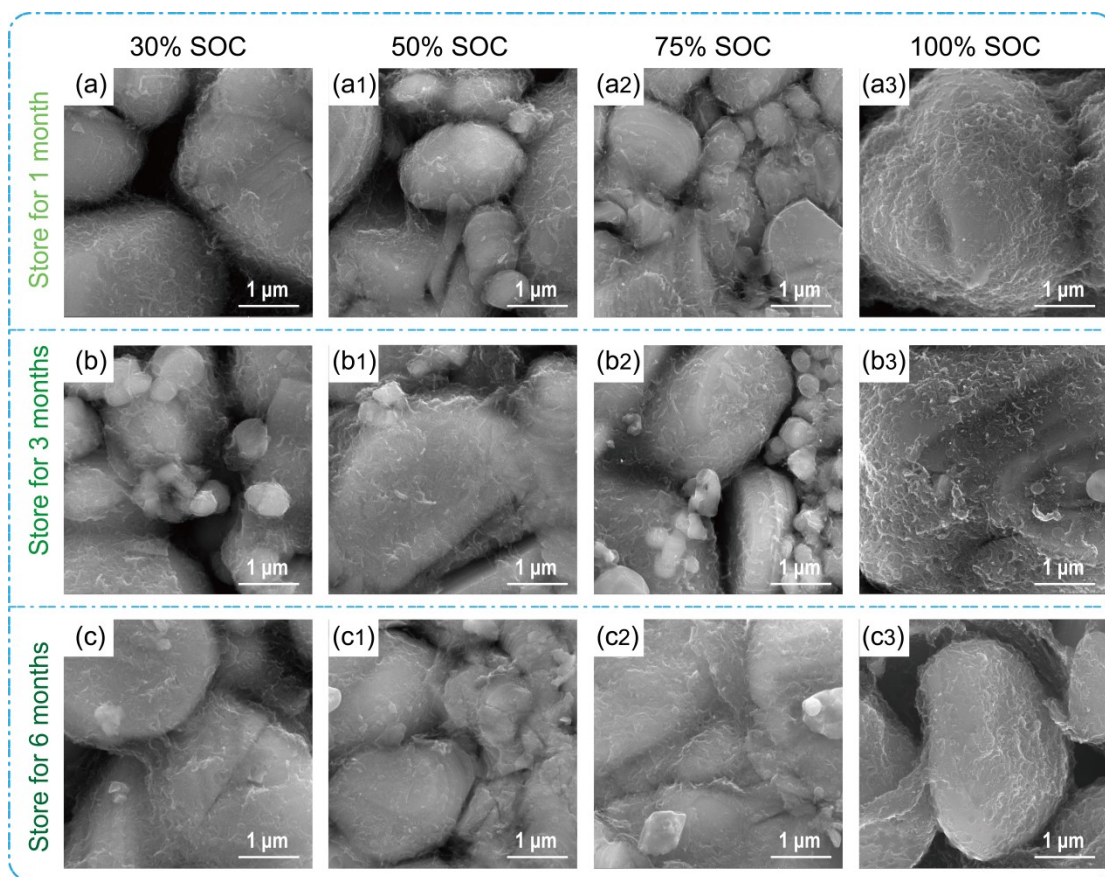

**Figure S3** (a) SEM of the cathode (alumina coated separator side) of 30% SOC store for 1 month at size 1  $\mu\text{m}$ . (a1)-(a3) SEM of the cathode under 50% SOC, 75% SOC and 100% SOC store for 1 months. (b)-(b3) SEM of the cathode of different SOC's stored for 3 months. (c)-(c3) Stored for 6 months.

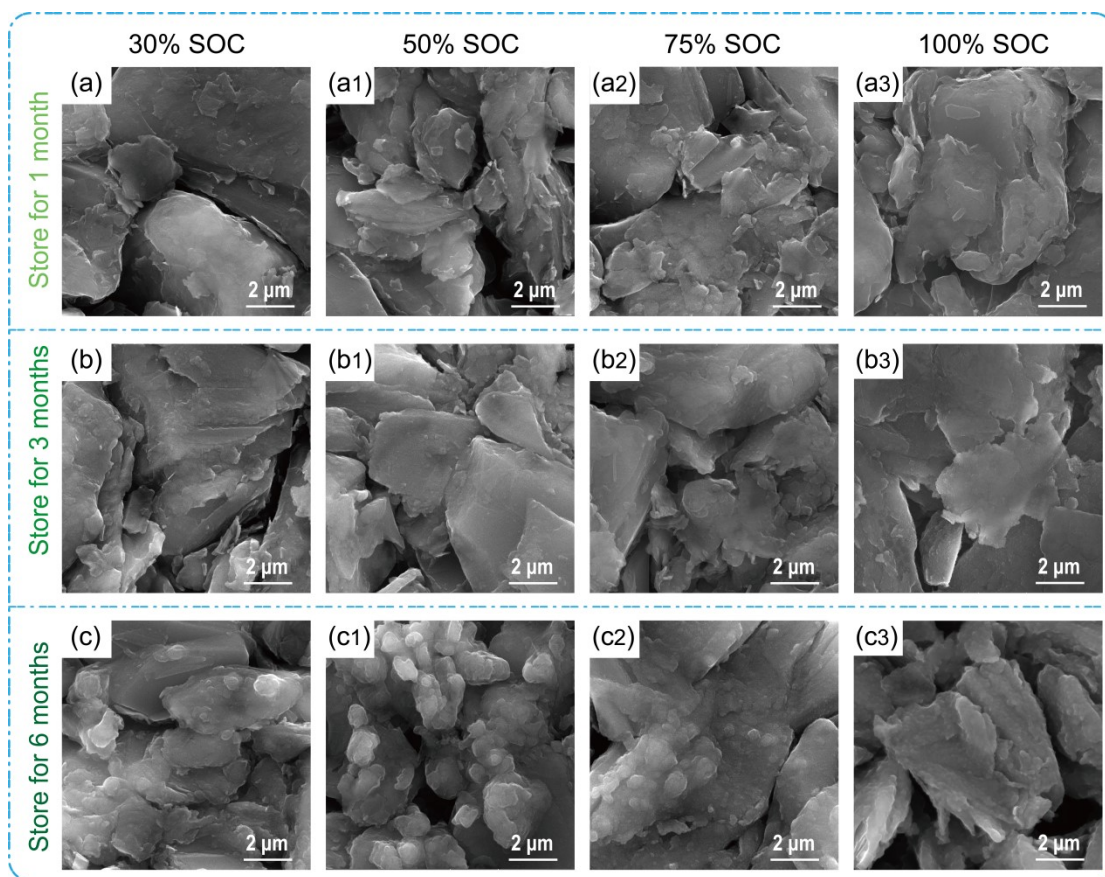

**Figure S4 (a)-(a3)** SEM of the anode of graphite under 30% SOC, 50% SOC, 75% SOC, and 100%SOC stored for 1 month at size 2 μm. **(b)-(b3)** Stored for 3 months. **(c)-(c3)** Stored for 6 months.

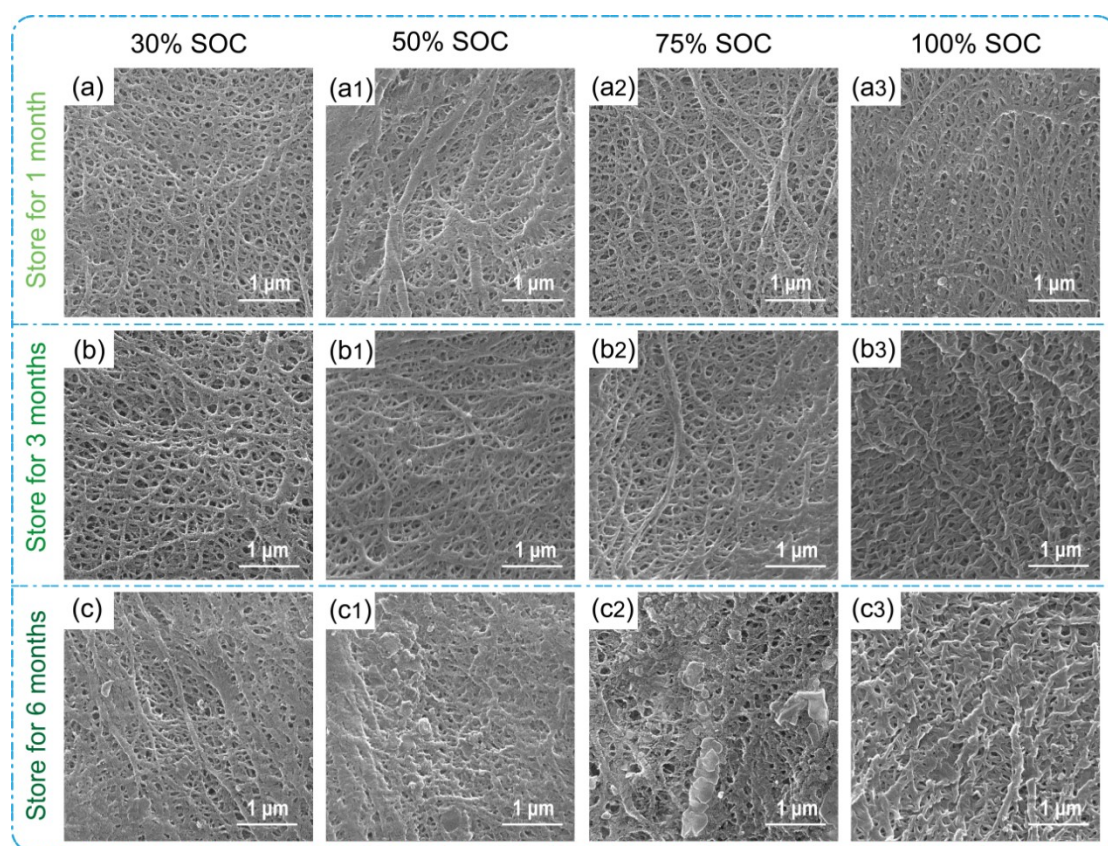

**Figure S5 (a)-(a3)** Electron micrographs (1 μm) of the battery separator (anode side) under 30% SOC, 50% SOC, 75% SOC, and 100% SOC stored for 1 month. **(b)-(b3)** SEM of the separator stored for 3 months. **(c)-(c3)** Stored for 6 months.

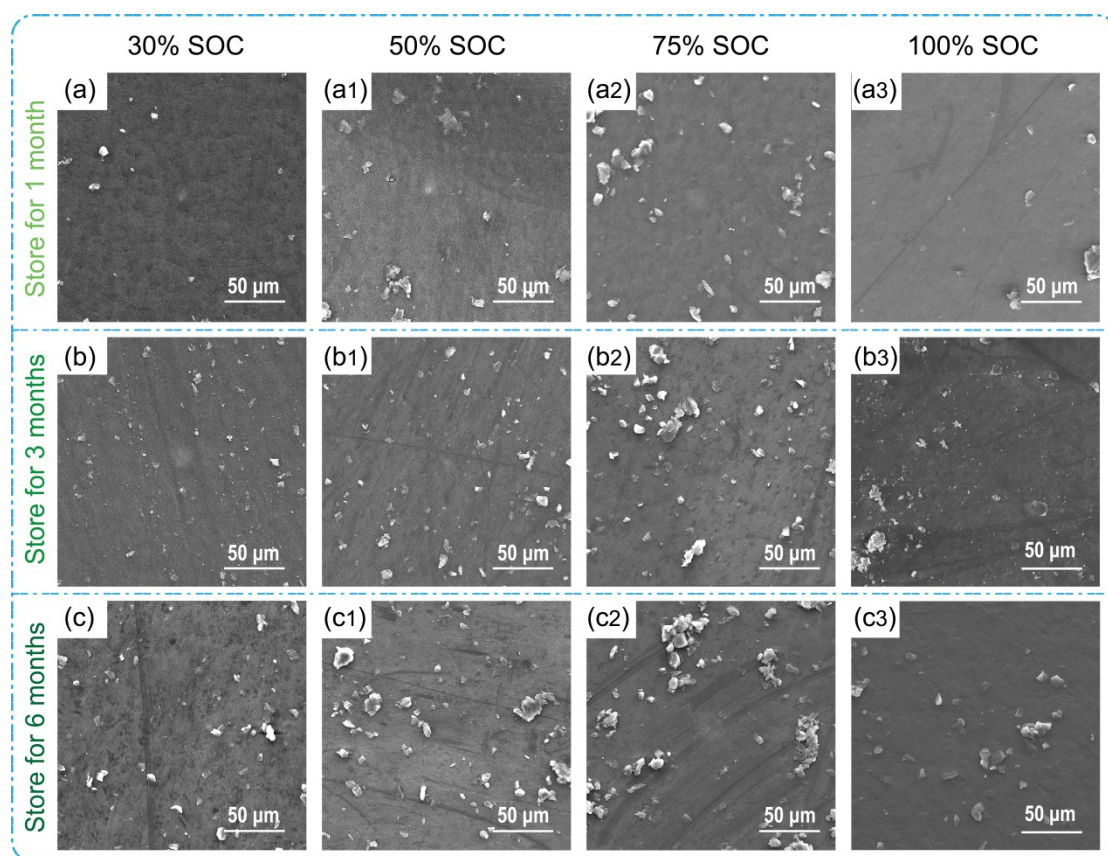

**Figure S6 (a)-(a3)** Electron micrographs (50  $\mu\text{m}$ ) of the battery separator (anode side) under 30% SOC, 50% SOC, 75% SOC, and 100% SOC stored for 1 month. **(b)-(b3)** Store for 3 months. **(c)-(c3)** Stored for 6 months.

**Table S6** Quantitative analysis data of dead lithium in the anode stored at 45°C for 1-6 months

| SOC  | Net weight of anode/ mg | Storage time/ month(s) | Li mass in the anode/ mg | The proportion of dead Li in the anode |
|------|-------------------------|------------------------|--------------------------|----------------------------------------|
| 30%  | 26.26                   | 1                      | 0.267                    | 1.017%                                 |
| 50%  | 32.76                   |                        | 0.401                    | 1.224%                                 |
| 75%  | 30.53                   |                        | 0.388                    | 1.271%                                 |
| 100% | 255.7                   |                        | 2.915                    | 1.140%                                 |
| 30%  | 33.04                   | 3                      | 0.479                    | 1.450%                                 |
| 50%  | 33.97                   |                        | 0.512                    | 1.507%                                 |
| 75%  | 31.55                   |                        | 0.481                    | 1.525%                                 |
| 100% | 270.8                   |                        | 4.035                    | 1.490%                                 |
| 30%  | 36.64                   | 6                      | 0.748                    | 2.041%                                 |
| 50%  | 33.46                   |                        | 0.704                    | 2.104%                                 |
| 75%  | 34.76                   |                        | 0.760                    | 2.186%                                 |
| 100% | 35.76                   |                        | 0.692                    | 1.935%                                 |

**Table S7** Quantitative analysis of lithium and cobalt content in graphite anode before and after storage

| Storage time       | Initial capacity/mAh | Recovery capacity/mAh | Lost capacity/mAh | Net weight of anode/mg | Co mass in the anode/mg | Li mass in the anode | Increment of dead Li in the anode | The proportion of dead Li in the anode | The proportion of Co in the anode |
|--------------------|----------------------|-----------------------|-------------------|------------------------|-------------------------|----------------------|-----------------------------------|----------------------------------------|-----------------------------------|
|                    |                      |                       |                   |                        |                         |                      |                                   |                                        |                                   |
| Before the storage |                      |                       |                   | 261.2                  | 0.03                    | 2.485                |                                   | 0.95%                                  | 0.011%                            |
| Store for 1 month  | 60.9                 | 59.4                  | 1.5               | 255.7                  | 0.095                   | 2.915                | 0.43                              | 1.14%                                  | 0.037%                            |
| Store for 2 months | 62.3                 | 59.3                  | 3                 | 269.1                  | 0.15                    | 3.375                | 0.89                              | 1.25%                                  | 0.056%                            |
| Store for 3 months | 60.9                 | 55.9                  | 5                 | 270.8                  | 0.20                    | 4.035                | 1.55                              | 1.49%                                  | 0.074%                            |
| Store for 6 months | 62.4                 | 55.5                  | 6.9               | 254.7                  | 0.28                    | 4.91                 | 2.43                              | 1.93%                                  | 0.110%                            |

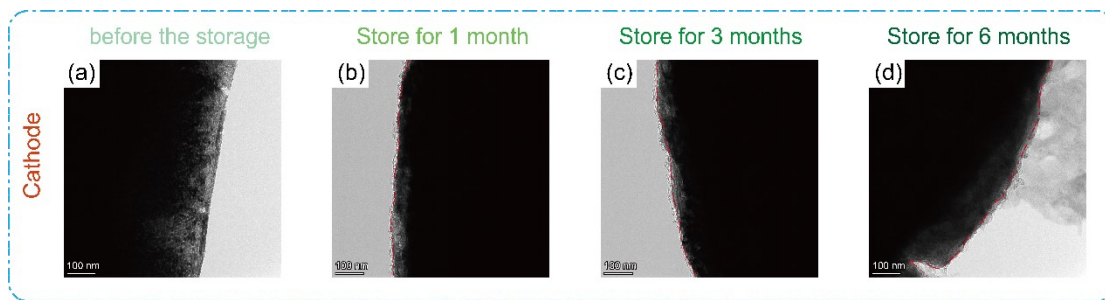

**Figure S7 (a)-(d)** TEM of the LCO cathode before storage, and stored for 1 month, 3 months, and 6 months under 100% SOC, respectively.
